# Supplementary material for: Genetic Variants and Tumor Immune Microenvironment: Clues for Targeted Therapies in Inflammatory Breast Cancer (IBC)
Source: MDPI journal article supplement (doi:10.3390/ijms22168924), 2021-08-19
Supplement: s1 [file s1]

|        |        |         |        |        |         |       |
|--------|--------|---------|--------|--------|---------|-------|
| ACVR1B | CBFB   | ERCC4   | KMT2C  | NCOR1  | RAD51   | XRCC2 |
| AKT1   | CCND1  | ESR1    | KRAS   | NEK2   | RAD51C  | XRCC3 |
| APC    | CDH1   | EXOC2   | MAP2K4 | NF1    | RAD51D  | ZBED4 |
| AR     | CDK4   | EXT2    | MAP3K1 | PALB2  | RB1     |       |
| ATM    | CDK6   | FAM175A | MDM2   | PALLD  | RET     |       |
| ATR    | CDKN2A | FANCC   | MED12  | PBRM1  | SEPT9   |       |
| AXIN2  | CHEK2  | FBXO32  | MEN1   | PCGF2  | SMAD4   |       |
| BAP1   | CSMD1  | FGFR1   | MLH1   | PIK3CA | SMARCA4 |       |
| BARD1  | CTNNB1 | FGFR2   | MRE11A | PIK3R1 | STK11   |       |
| BLM    | DIRAS3 | GATA3   | MSH2   | PMS1   | SYNE1   |       |
| BMPR1A | EGFR   | GEN1    | MSH6   | PMS2   | TGFB1   |       |
| BRCA1  | EP300  | HERC1   | MUC16  | PPM1L  | TP53    |       |
| BRCA2  | EPCAM  | HOXB13  | MUTYH  | PTEN   | TRAF5   |       |
| BRIP1  | ERBB2  | IRAK4   | MYC    | PTGFR  | VHL     |       |
| CASP8  | ERBB3  | ITCH    | NBN    | RAD50  | WEE1    |       |

**Table S4. Breast cancer panel DHS-001Z (Qiagen).** The breast cancer panel used in this study covers 93 genes and is able to detect single nucleotide variants (SNV) and small insertions and deletions (indels). Copy number changes were not studied.
