# Supplementary material for: Genetic Variants and Tumor Immune Microenvironment: Clues for Targeted Therapies in Inflammatory Breast Cancer (IBC)
Source: MDPI journal article supplement (doi:10.3390/ijms22168924), 2021-08-19
Supplement: s1 [file s1]

| Patient ID | Tissue biopsy                                                                                                                                                                                                                       | Liquid biopsy                                                                                                                                              |
|------------|-------------------------------------------------------------------------------------------------------------------------------------------------------------------------------------------------------------------------------------|------------------------------------------------------------------------------------------------------------------------------------------------------------|
| Pt-19      | Skin biopsy- Month 54 (Stage IV)                                                                                                                                                                                                    | Plasma - Month 54 (Stage IV)                                                                                                                               |
|            | <b>**ErbB2 c.2689C&gt;T; p. R897W (56%) Loss/T3</b><br><b>PIK3CA c.3140A&gt;G; p.H1047R (48%) Gain/T2C</b><br><b>ESR1 c.1613A&gt;G; p. D538G (22%) Gain/T1B</b>                                                                     | <b>**ErbB2 c.2689C&gt;T; p. R897W (52%) Loss/T3</b>                                                                                                        |
| Pt-20      | Skin chest biopsy - Month 8 (Stage IV)                                                                                                                                                                                              | Plasma- Month 8 (Stage IV)                                                                                                                                 |
|            | <b>TP53 c.796G&gt;A; p. G266R (48%) Loss/T2C</b><br><b>MRE11 c.1532delA; p. N511fs*13 (2.1%) Loss/T2C</b><br><b>RB1 c.131_132insTT; p. V45fs*21 (43%) Loss/T3</b>                                                                   | <b>TP53 c.796G&gt;A; p. G266R (48%) Loss/T2C</b><br><b>AR c.170T&gt;A; p. L57Q (4.06%) Loss/T3</b><br><b>RB1 c.131_132insTT; p. V45fs*21 (50%) Loss/T3</b> |
| Pt-21      | Cells pleural fluid - Month 9 (Stage IV)                                                                                                                                                                                            | Plasma- Month 3 (Stage IV)                                                                                                                                 |
|            | <b>Not pathogenic or likely path variants detected</b>                                                                                                                                                                              | <b>MAP2K4 c.400C&gt;T; p. R134W (26%) Gain/T3</b><br><b>PMS2 c.89A&gt;C; p. Q30P (2%) Loss/T2C</b><br><b>MSH6 c.3261delC; p. F1088fs*2 (2%) Loss/T2C</b>   |
| Pt-22      | Cells pleural fluid- Month 29 (Stage IV)                                                                                                                                                                                            | Serum- Month 29 (Stage IV)                                                                                                                                 |
|            | <b>TP53 c.818G&gt;A; p. R273H (30%) T2C</b><br><b>NCOR1 c.842+1G&gt;A (12%) Loss/T3</b><br><b>PTEN c.955_958delACTT; p. T319* (9.83%) Loss/T2C</b><br><b>PTEN c.843_858delAGGACCAGAGGAAACC</b><br><b>p.G282fs*4 (8.1%) Loss/T2C</b> | <b>TP53 c.818G&gt;A; p. R273H (2%) T2C</b>                                                                                                                 |
| Pt-23      | Cells pleural fluid- Month 6 (Stage IV)                                                                                                                                                                                             | Serum - Month 6 (Stage IV)                                                                                                                                 |
|            | <b>*BRCA1 c.5123C&gt;T; p. A1708V (49%) Loss/T1A</b><br><b>TP53 c.637C&gt;T; p. R213* (12%) Loss/T2C</b>                                                                                                                            | <b>*BRCA1 c.5123C&gt;T; p. A1708V (54%) Loss/T1A</b><br><b>TP53 c.637C&gt;T; p. R213* (11%) Loss/T2C</b>                                                   |
| Pt-24      | Breast biopsy- Month 5 (Stage IIIC)                                                                                                                                                                                                 | Plasma- Month 9 (Stage IIIC)                                                                                                                               |
|            | <b>**ATM c.6095G&gt;A; p. R2032K (53%) Loss/T2C</b><br><b>**APC c.3386T&gt;C; p. L1129S (48%) Loss/T3</b><br><b>PIK3CA c.3140A&gt;G; p.H1047R (4.8%) Gain/T1A</b>                                                                   | <b>**ATM c.6095G&gt;A; p. R2032K (51%) T2C</b><br><b>**APC c.3386T&gt;C; p. L1129S (51%) Loss/T3</b>                                                       |
| Pt-25      | Skin biopsy- Month 19 (Stage III)                                                                                                                                                                                                   | Serum- Month 19 (Stage III)                                                                                                                                |
|            | <b>*CHEK2 c.573+1G&gt;A Splicing (50%) Loss/T2C</b><br><b>TP53 c.286dupT; p. S96fs*53 (4.88%) Loss/T2C</b>                                                                                                                          | <b>*CHEK2 c.573+1G&gt;A (46%) Splicing Loss/T2C</b>                                                                                                        |

|        |                                                       |                                                       |
|--------|-------------------------------------------------------|-------------------------------------------------------|
| Pt-26  | <b>Breast biopsy-Month 1 (Stage IIIB)</b>             | <b>Serum (cfDNA2)- Month 1 (Stage IIIB)</b>           |
|        | <b>MSH6 c.3261delC; p. F1088fs*2 (2.28%) Loss/T2C</b> | <b>MSH6 c.3261delC; p. F1088fs*2 (3.09%) Loss/T2C</b> |
| Pt- 27 |                                                       | <b>Plasma- Month 1 (Stage IIIC)</b>                   |
|        | No tissue available                                   | <b>MSH6 c.3261delC; p. F1088fs*2 (2.27%) Loss/T2C</b> |

**Table S2. Germline and somatic variants in ER+ Her2- IBC.** Clinically relevant germline and somatic variants are shown. Pathogenic (in red), likely-pathogenic (in blue) or variants of uncertain significance (in black). \*\*Confirmed germline variants. \*Putative germline variants. Variants were also classified according to their actionability: T1A/T1B indicates strong clinical significance; T2C indicates potential clinical significance and FDA-approved therapies for different tumor types or investigational therapies (off-label treatments); T3 indicates biomarker is of uncertain clinical significance. Stage of the disease at the time of sample collection is indicated in each case. For each variant, allele fraction (AF) is indicated in parenthesis.
