# Supplementary material for: Genetic Variants and Tumor Immune Microenvironment: Clues for Targeted Therapies in Inflammatory Breast Cancer (IBC)
Source: MDPI journal article supplement (doi:10.3390/ijms22168924), 2021-08-19
Supplement: s1 [file s1]

|            | cfDNA                         |                       |                 | DNA from tumor<br>(tissue or malignant cells from pleural effusion or ascites) |                       |                 | DNA from normal tissue or whole blood<br>(to study germline variants) |                       |                 |
|------------|-------------------------------|-----------------------|-----------------|--------------------------------------------------------------------------------|-----------------------|-----------------|-----------------------------------------------------------------------|-----------------------|-----------------|
| Patient ID | Quantity to prepare libraries | Total number of reads | Mean read depth | Quantity of DNA to prepare libraries                                           | Total number of reads | Mean read depth | Quantity of DNA to prepare libraries                                  | Total number of reads | Mean read depth |
| Pt-001     | 13 ng (plasma)<br>Month 12    | 4,438,780             | 1,450.76        | 17 ng (skin biopsy; FFPE)<br>Month 12                                          | 3,761,410             | 1,270.41        | 129 ng (normal tissue; FFPE)                                          | 10,337,397            | 3,459.28        |
| Pt-002     | 19 ng (serum)<br>Month 33     | 3,942,080             | 1,279.20        | 80 ng (breast tissue; OCT)<br>Month 33                                         | 3,754,267             | 1,270.41        | 151 ng (whole blood)                                                  | 9,066,325             | 2,606.33        |
| Pt-003     | 19 ng (serum)<br>Month 12     | 3,222,292             | 1,073.01        | 80 ng (pleural effusion; OCT)<br>Month 12                                      | 3,254,060             | 1,122.18        | 232 ng (normal tissue; FFPE)                                          | 11,348,728            | 3,878.66        |
| Pt-004     | 30 ng (serum)<br>Month 17     | 4,987,114             | 718.06          | 310 ng (skin breast biopsy; FFPE)<br>Month 17                                  | 7,714,165             | 2,673.43        | 298 ng (normal tissue; FFPE)                                          | 9,385,812             | 2,665.22        |
| Pt-005     | 10 ng (serum)<br>Month 13     | 4,176,953             | 355.97          | 417 ng (skin upper arm; OCT)<br>Month 13                                       | 8,671,157             | 2,918.10        | 150 ng (whole blood)                                                  | 9,346,793             | 3,207.81        |
| Pt-006     | 45 ng (serum)<br>Month 3      | 4,967,670             | 1,764.53        | 300 ng (breast tissue; OCT)<br>Month 3                                         | 8,297,537             | 2,816.02        | Genetic clinical testing show BRCA2 germline variant                  |                       |                 |
| Pt-007     | 80 ng (plasma)<br>Month 21    | 3,391,998             | 1,115.87        | 80 ng (pleural effusion; OCT)<br>Month 26                                      | 3,872,538             | 1,281.61        | 181 ng (whole blood)                                                  | 8,026,668             | 3,035.35        |
| Pt-008     | 30 ng (plasma)<br>Month 15    | 6,088,580             | 689.97          | 301 ng (skin breast biopsy; OCT)<br>Month 8                                    | 6,700,776             | 2,335.01        | 155 ng (whole blood)                                                  | 7,656,821             | 1,425.38        |
| Pt-009     | 17 ng (plasma)<br>Month 30    | 4,282,461             | 1,544.24        | 425 ng (skin biopsy; FFPE)<br>Month 28                                         | 15,200,246            | 5,285.77        | 177 ng (whole blood)                                                  | 8,087,635             | 2,644.36        |

|        |                                |           |          |                                                |            |          |                                 |            |          |
|--------|--------------------------------|-----------|----------|------------------------------------------------|------------|----------|---------------------------------|------------|----------|
| Pt-010 | 31 ng<br>(plasma)<br>Month 9   | 4,673,532 | 1,486.47 | 279 ng<br>(lymph node; FFPE)<br>Month 9        | 11,033,228 | 3,538.95 | 171 ng<br>(whole blood)         | 8,686,525  | 2,990.95 |
| Pt-011 | 12 ng<br>(plasma)<br>Month 23  | 3,710,359 | 1,344.14 | 182 ng<br>(skin chest wall; FFPE)<br>Month 21  | 9,968,580  | 3,484.52 | 269 ng<br>(whole blood)         | 7,685,845  | 2,763.74 |
| Pt-012 | 21 ng<br>(serum)<br>Month 27   | 5,889,286 | 1,969.86 | 254 ng<br>(skin biopsy; FFPE)<br>Month 27      | 9,539,497  | 3,271.85 | 260 ng<br>(normal tissue; FFPE) | 10,117,393 | 3,193.36 |
| Pt-013 | 13 ng<br>(plasma)<br>Month 9   | 3,312,305 | 1,155.96 | Not tumor tissue<br>available                  | N/A        | N/A      | 151 ng<br>(whole blood)         | 8,511,404  | 2,713.51 |
| Pt-014 | 111 ng<br>(plasma)<br>Month 10 | 4,621,711 | 1,478.06 | 259 ng<br>(breast tissue; FFPE)<br>Month 7     | 18,327,056 | 6,496.75 | 296 ng<br>(whole blood)         | 7,756,132  | 2,743.80 |
| Pt-015 | 17 ng<br>(plasma)<br>Month 1   | 3,878,882 | 1,303.97 | 331 ng<br>(skin breast biopsy; OCT)<br>Month 1 | 7,362,160  | 2,626.14 | 223 ng<br>(whole blood)         | 8,429,943  | 3,069.48 |
| Pt-016 | 101 ng<br>(serum)<br>Month 44  | 5,313,685 | 1,776.08 | 300 ng<br>(ascites; OCT)<br>Month 44           | 4,073,252  | 1,220.99 | Not available                   |            |          |
| Pt-017 | 23 ng<br>(serum)<br>Month 35   | 4,993,580 | 1,623.99 | 300 ng<br>(skin chest wall; OCT)<br>Month 35   | 4,460,607  | 1,435.68 | Not available                   |            |          |
| Pt-018 | 16 ng<br>(plasma)<br>Month 15  | 3,280,303 | 1,093.23 | 259 ng<br>(breast tumor; FFPE)<br>Month 15     | 8,187,575  | 1,661.08 | Not available                   |            |          |
| Pt-019 | 10 ng<br>(plasma)<br>Month 54  | 5,628,552 | 1,801.65 | 80 ng<br>(skin biopsy; OCT)<br>Month 54        | 8,752,734  | 2,328.37 | 155 ng<br>(whole blood)         | 7,404,018  | 2,854.16 |
| Pt-020 | 17 ng<br>(plasma)<br>Month 8   | 5,331,490 | 610.27   | 300 ng<br>(skin chest biopsy; OCT)<br>Month 8  | 7,193,646  | 2,536.12 | 149 ng<br>(whole blood)         | 8,020,579  | 2,965.83 |
| Pt-021 | 39 ng                          | 3,868,785 | 1,240.69 | 80 ng                                          | 3,900,340  | 1,347.22 | 227.2 ng                        | 7,806,273  | 2,937.94 |

|        |                               |                               |                            |                                            |            |          |                                 |            |          |
|--------|-------------------------------|-------------------------------|----------------------------|--------------------------------------------|------------|----------|---------------------------------|------------|----------|
|        | (plasma)<br>Month 3           |                               |                            | (pleural fluid; FFPE)<br>Month 9           |            |          | (whole blood)                   |            |          |
| Pt-022 | 10 ng<br>(serum)<br>Month 29  | 5,081,025                     | 532.79                     | 300 ng<br>(pleural fluid; OCT)<br>Month 29 | 5,580,422  | 1,854.43 | Not available                   |            |          |
| Pt-023 | 335 ng<br>(serum)<br>Month 6  | 4,834,788                     | 1,519.55                   | 138 ng<br>(pleural fluid; OCT)<br>Month 6  | 9,133,646  | 3,171.36 | Not available                   |            |          |
| Pt-024 | 73 ng<br>(plasma)<br>Month 33 | 10,339,648                    | 3, 542.83                  | 215 ng<br>(breast biopsy; FFPE)<br>Month 5 | 9,668,240  | 3,547.94 | 400 ng<br>(normal tissue; FFPE) | 9, 953,971 | 3,395.04 |
| Pt-025 | 120 ng<br>(serum)<br>Month 19 | 5,707,795                     | 882.45                     | 300 ng<br>(skin biopsy; OCT)<br>Month 19   | 7,562,846  | 2,455.77 | Not available                   |            |          |
| Pt-026 | 20 ng<br>(serum)<br>Month 1   | 2,474,297<br>Middle<br>output | 811.19<br>Middle<br>output | 178 ng<br>(breast biopsy; OCT)<br>Month 1  | 7,405,013  | 2,660.17 | Not available                   |            |          |
| Pt-027 | 39 ng<br>(plasma)<br>Month 1  | 5,191,168                     | 1,619.44                   | No tissue available                        | N/A        | N/A      | Not available                   |            |          |
| Pt-028 | 55 ng<br>(serum)<br>Month 15  | 5,307,122                     | 1,686.17                   | 158 ng<br>(skin biopsy; OCT)<br>Month 15   | 10,561,638 | 3,420.22 | 75 ng<br>(normal tissue; FFPE)  | 9,155,511  | 3,219.77 |
| Pt-029 | 60 ng<br>(serum)<br>Month 33  | 5,694,013                     | 2,010.89                   | 46 ng<br>(pleural fluid; OCT)<br>Month 33  | 8,999,700  | 3,228.20 | Not available                   |            |          |
| Pt-030 | 68 ng<br>(serum)<br>Month 50  | 5,368,224                     | 938.61                     | 300 ng<br>(pleural fluid; OCT)<br>Month 50 | 4,460,607  | 1,435.68 | Not available                   |            |          |
| Pt-031 | 17 ng<br>(plasma)<br>Month 25 | 5,536,747                     | 1,813.84                   | 211 ng<br>(skin biopsy; FFPE)<br>Month 31  | 6,982,961  | 2,447.13 | Not available                   |            |          |
| Pt-032 | 23 ng                         | 3,426,829                     | 1,117.79                   | No tissue available                        | N/A        | N/A      | Not available                   |            |          |

|  |                     |  |  |  |  |  |  |  |  |
|--|---------------------|--|--|--|--|--|--|--|--|
|  | (plasma)<br>Month 8 |  |  |  |  |  |  |  |  |
|--|---------------------|--|--|--|--|--|--|--|--|

**Supplementary Table 6. Total number of reads and mean read depth by NGS.** The quantity of DNA to prepare the libraries, number of reads and mean read depth are indicated for each sample. The time of collection of the sample is indicated in each case. For Pt-001, we also studied cfDNA plasma collected at month 22. The samples that were collected at the same time point (blood and paired tumor tissue or cells) are highlighted in yellow.
